# Supplementary material for: Surface Decontamination and Shelf-Life Extension of Gilthead Sea Bream by Alternative Washing Treatments
Source: MDPI journal article supplement (doi:10.3390/su14105887), 2022-05-12
Supplement: s1 [file s1]

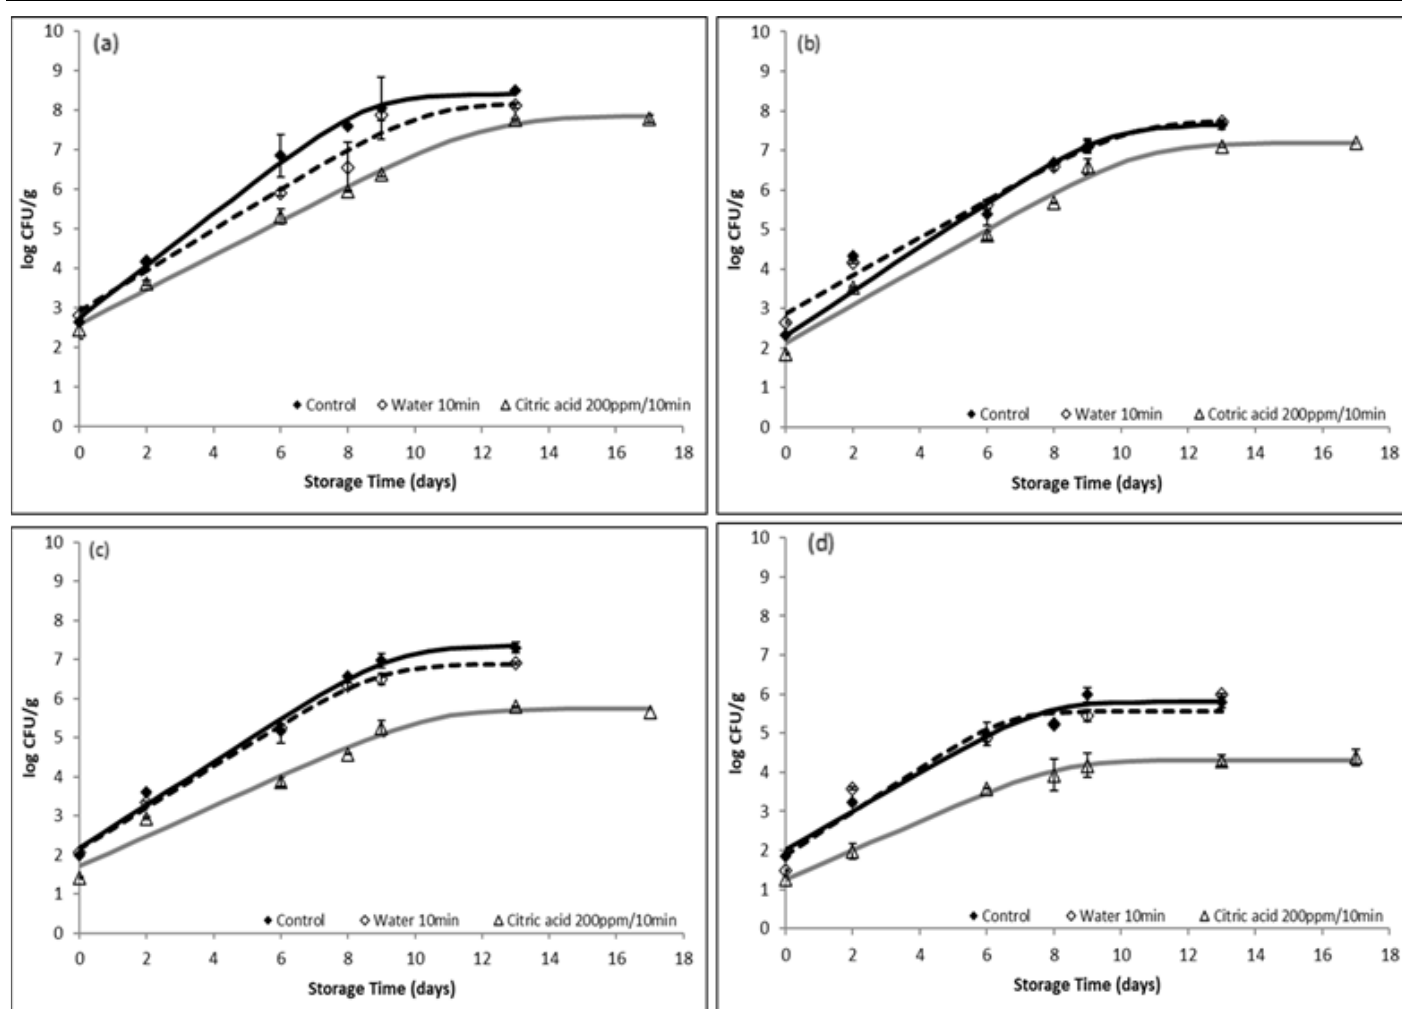

**Figure S1.** Growth of (a) total viable count, (b) *Pseudomonas* spp., (c) *Enterobacteriaceae* spp. and (d) *H<sub>2</sub>S*-producing bacteria in gutted gilthead sea bream stored at 5°C, after washing with 200 ppm citric acid for 10 min.

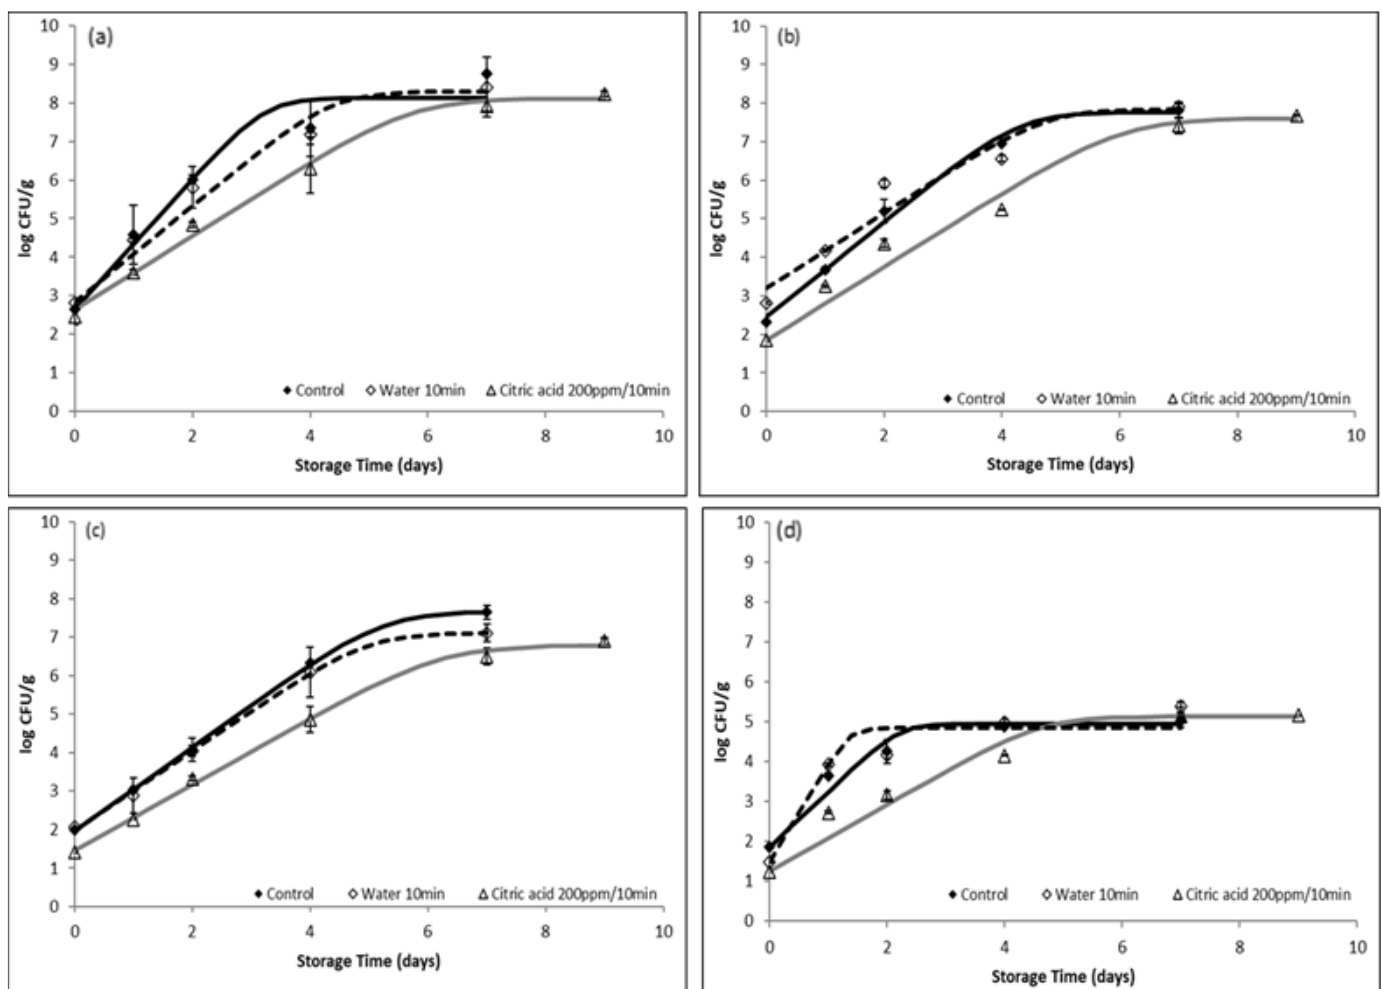

**Figure S2.** Growth of (a) total viable count, (b) *Pseudomonas* spp., (c) *Enterobacteriaceae* spp. and (d) *H<sub>2</sub>S*-producing bacteria in gutted gilthead sea bream stored at 10°C, after washing with 200 ppm citric acid for 10 min.

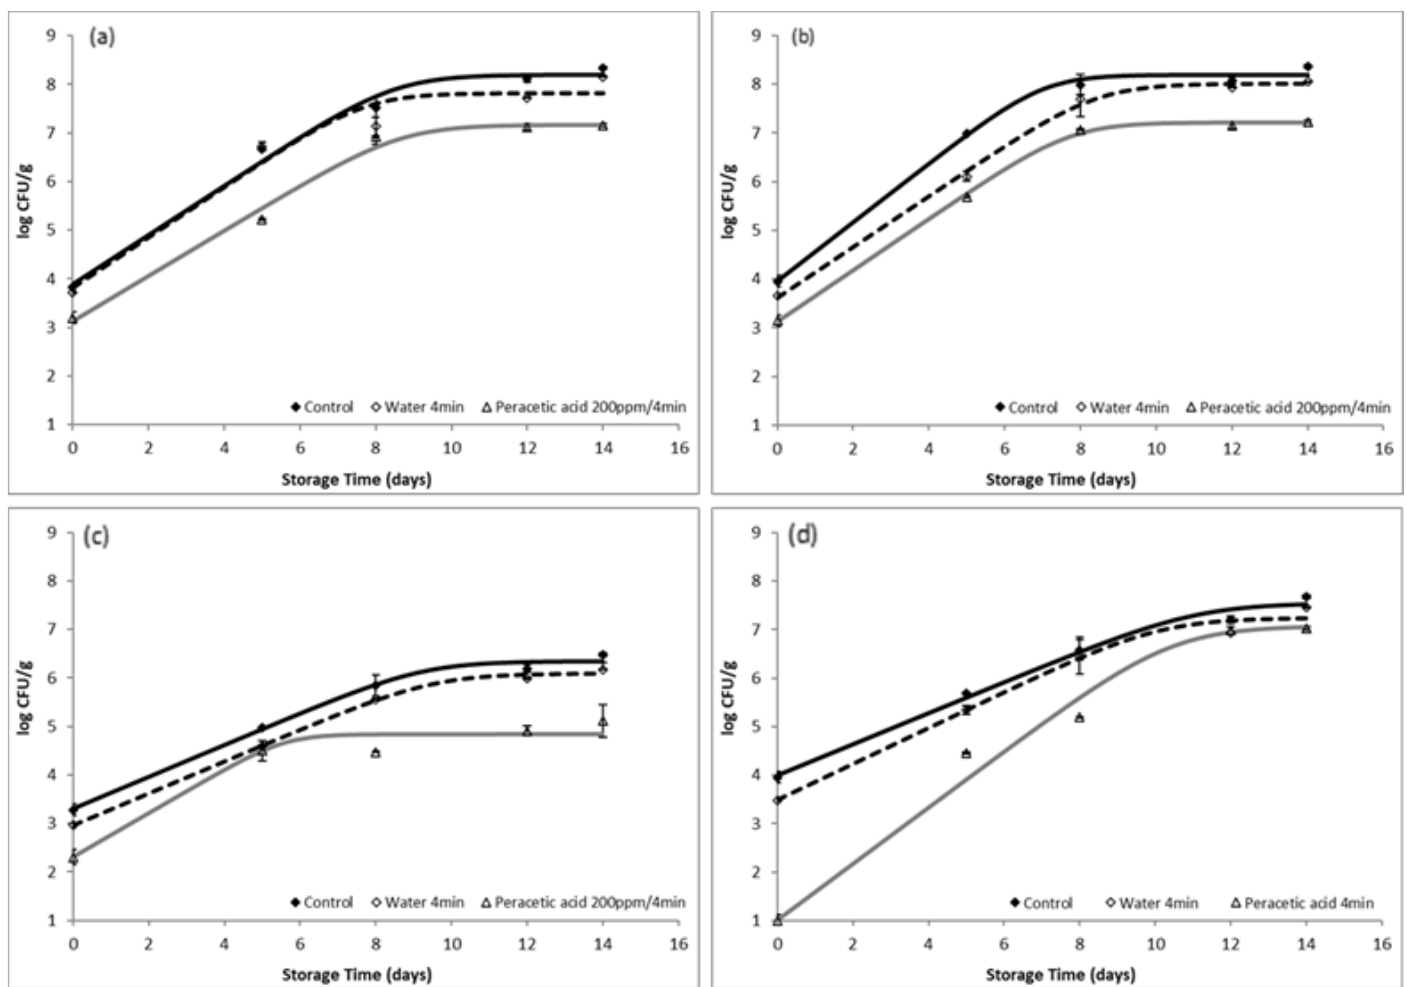

**Figure S3.** Growth of (a) total viable count, (b) *Pseudomonas* spp., (c) *Enterobacteriaceae* spp. and (d) *H<sub>2</sub>S*-producing bacteria in gutted gilthead sea bream stored at 5°C, after washing with 200 ppm peracetic acid for 4 min.

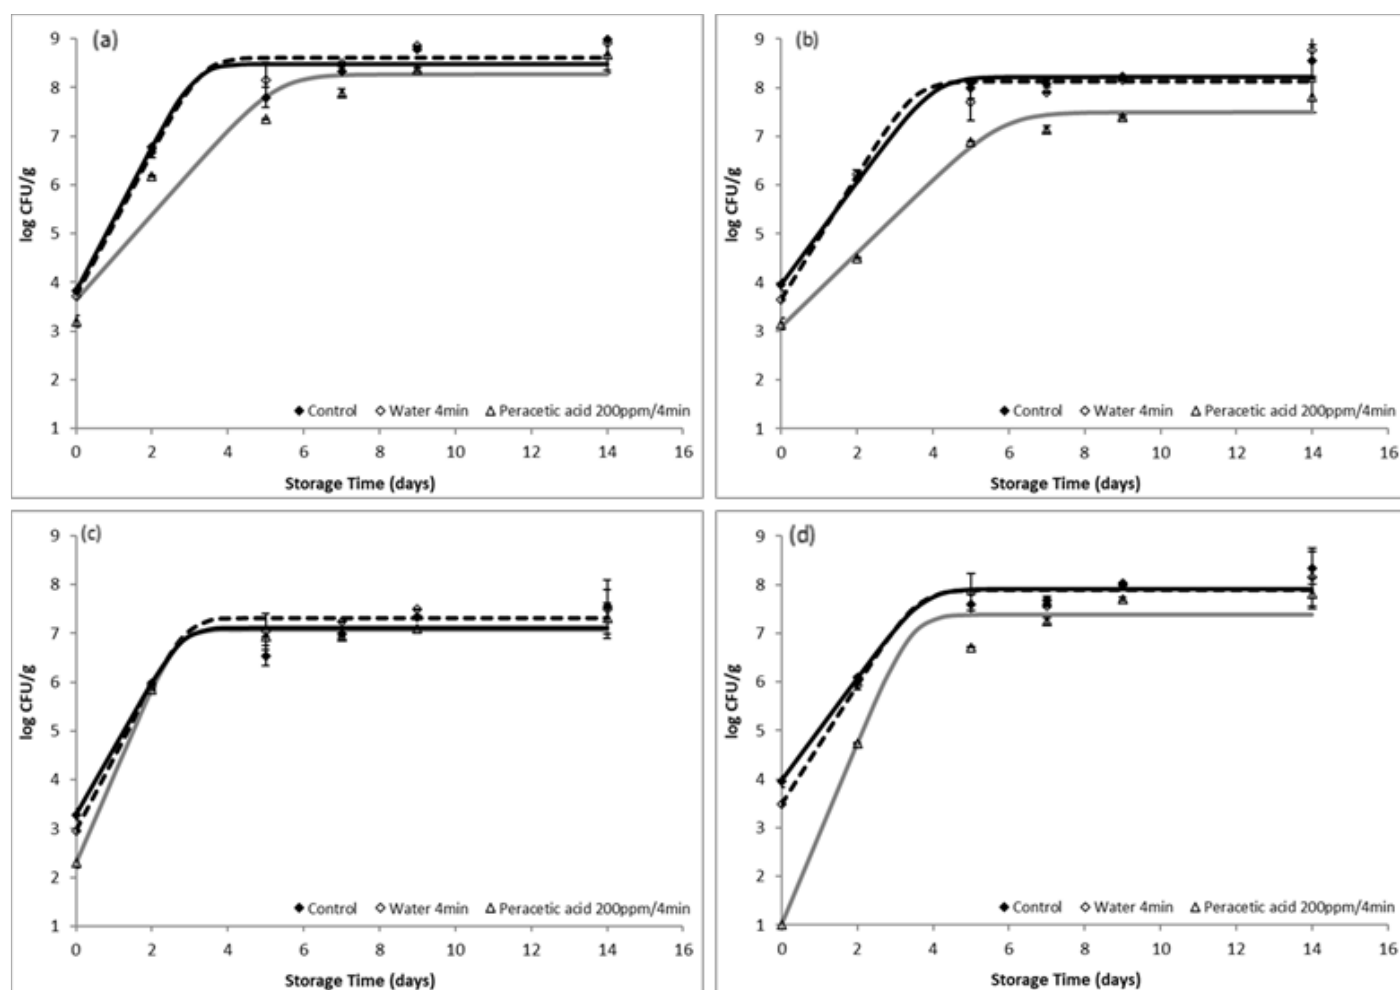

**Figure S4.** Growth of (a) total viable count, (b) *Pseudomonas* spp., (c) *Enterobacteriaceae* spp. and (d) *H<sub>2</sub>S*-producing bacteria in gutted gilthead sea bream stored at 10°C, after washing with 200 ppm peracetic acid for 4 min.
